# Supplementary material
Source: publisher figshare collection journal article supplement (https://sage.figshare.com/ndownloader/files/14072729)
Supplement: Supplementary file 1 [file 14072729]

**Supplemental Table. ACT-predicted Interactions between Female and Male Executives and Workplace Objects**

| Behaviors                                                    | Object                           | Actor-based Deflection for |                | Deflection Difference | Gender-deviant for |
|--------------------------------------------------------------|----------------------------------|----------------------------|----------------|-----------------------|--------------------|
|                                                              |                                  | Female Executive           | Male Executive |                       |                    |
| Concepts Rated by Women                                      |                                  |                            |                |                       |                    |
| (1.62, .98, 1.29)<br>collaborate with, chat up, beam at      | competitor<br>(.69, 1.65, 1.78)  | .82                        | 1.38           | −.56                  | male executive     |
| (.40, 1.29, 1.45)<br>bargain with, stop, discipline          |                                  | 1.50                       | .64            | .86                   | female executive   |
| (2.04, .45, 1.73)<br>chitchat with, drink with, chat up      | VIP<br>(1.79, 2.79, 1.87)        | .90                        | 2.28           | −1.38                 | male executive     |
| (.93, .54, 1.67)<br>chatter to, drink with, jest with        |                                  | .96                        | 1.21           | −.25                  | neither            |
| (.92, 1.53, .98)<br>direct, sell something to, bargain with  | opponent<br>(−.54, .79, 1.32)    | 1.31                       | .76            | .55                   | female executive   |
| (−.16, 1.90, 1.41)<br>discipline, command, penalize          |                                  | 2.11                       | .42            | 1.69                  | female executive   |
| Concepts Rated by Men                                        |                                  |                            |                |                       |                    |
| (1.32, .01, .53)<br>concur with, show something to, pay for  | competitor<br>(1.26, 1.66, 1.57) | .08                        | 1.01           | −.93                  | male executive     |
| (1.41, 1.15, 1.01)<br>barter with, talk to, supervise        |                                  | .06                        | .39            | −.33                  | neither            |
| (1.38, −.15, .55)<br>concur with, show something to, pay for | VIP<br>(1.30, 2.25, 1.33)        | .12                        | 1.12           | −1.00                 | male executive     |
| (1.48, .89, 1.03)<br>place order with, speak to, barter with |                                  | .02                        | .49            | −.47                  | neither            |
| (.66, .44, .19)<br>pay for, tell something to, turn to       | opponent<br>(−.46, .24, 1.01)    | .43                        | 1.20           | −.77                  | male executive     |
| (.57, 1.81, .71)<br>discipline, confront, exalt              |                                  | .71                        | .67            | .04                   | neither            |

*Notes:* Simulation results come from the 2001–2003 U.S. *Interact* dictionaries (Francis and Heise 2006). The EPA profiles in the Behaviors column create the least total deflection for a female executive (first profile) or a male executive (second profile) directing an action at the object in that row. All results except the “opponent” identity come from the business institution of the dictionary. We included “opponent” because it offers a unique EPA profile not available among the business identities and because we felt that executives may perceive executives who run competing companies as their opponents.
